# Supplementary material
Source: PubMed Central journal article supplement (PMC2737684)
Supplement: NIHMS126052-supplement-1.pdf [file NIHMS126052-supplement-1.pdf]

## Suppl Fig. 1

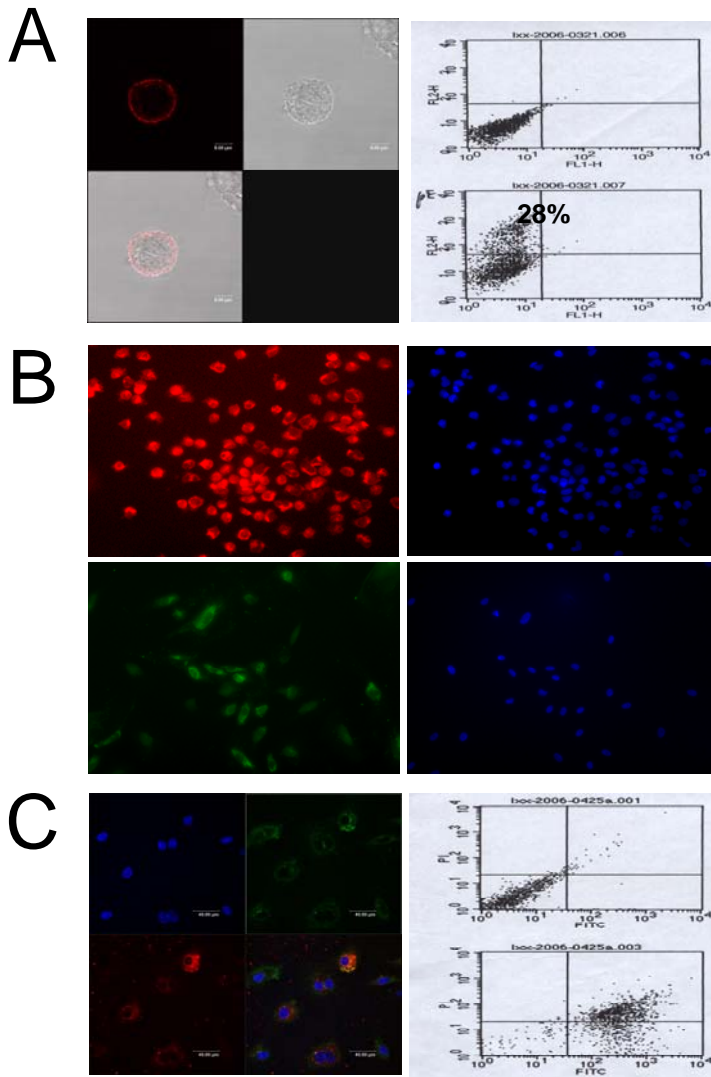

**Suppl Fig 1. Identification of human cord blood-derived EPCs.** After 2 passages, the EPCs were stained with antibodies against CD34-FITC and analyzed by confocal fluorescent microscopy (A, left) and fluorescent activating cell sorter (FACS) (A, right) analysis, the upper figure is isotype control. Scale bar=8  $\mu$ m (B) EPCs were stained with Hoechst and antibodies against VEGFR-2 (KDR) (red) and vWF (green) and analyzed by confocal fluorescent microscopy. (C) Uptake of Dil-acLDL (red) for 4 hr at 37°C before binding of UEA (green) for 1hr, and stained with Hoechst (blue), the figures shown are confocal fluorescent microscopy analysis (left) and FACS analysis (right). Scale bar=40  $\mu$ m. The presented data were representative from 3 separate experiments.

**Methods for EPC Identifications.** Cells were incubated with 1,1-dioctadecyl-3,3,3,3-tetramethylindocarbocyanine perchlorate-labeled acetylated LDL (DiI-acLDL; 10  $\mu$ g/ml; Sigma) at 37 °C for 4 hr. After fixed with 2% paraformaldehyde, the cells were incubated with FITC-labeled Ulex europaeus agglutinin (UEA, 10  $\mu$ g/ml; Sigma) for 1hr. The cells were also incubated with FITC conjugated primary antibodies against CD34 (BD Pharmingen, San Diego, CA ), and VEGF receptor 2 (KDR, Sigma), vWF (Santa Cruz Biotech) were also detected. The results were obtained by Leica confocal fluorescence microscope.

**Fluorescence-Activated Cell Sorting (FACS) Analysis.** The percentage of cells expressing EPC markers was quantified by FACS assay. Briefly, the cells were trypsinized and re-suspended in PBS staining buffer to obtain a concentration of  $1 \times 10^5$  cells/ml, and then fixed with 2% paraformaldehyde. The markers of EPC detected were phycoerythrin (PE)-conjugated mouse anti-human CD34 (BD Pharmingen), and DiI-acLDL, FITC-conjugated UEA. Isotype-identical antibodies served as negative controls. 10,000 events per sample were analyzed with a Beckman Coulter EPICS XL flow cytometer with EXPO32 ADC software. The data was reported as the percentage of EPCs that expressed these markers.

## Suppl Fig.2

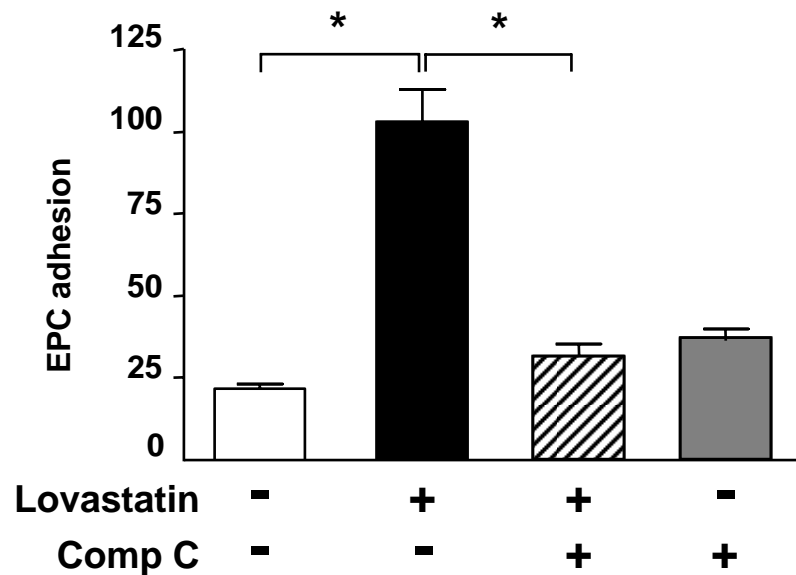

### Suppl Figure 2. AMPK is involved in the lovastatin-induced EPC adhesion.

EPCs were plated onto fibronectin-coated 24-well plates and cultured until confluent, and then were pretreated with or without Compound C (10  $\mu$ M) followed by the addition of lovastatin (10  $\mu$ M) for 24 hr. The cells were trypsinized and reseeded in fibronectin-coated wells at  $5 \times 10^5$  cells/well. After incubation for 1 hr at 37° C, the non-adherent cells were removed by washing three times with PBS. Then the rest of cells were labeled with Hoechst 33342. To quantify the number of adhesion cells, 5 random fields of each group were captured under a fluorescence microscope and the numbers of stained cells were counted respectively. Results are mean  $\pm$  S.D. from 3 independent experiments, each performed in triplicate (\* indicates  $p < 0.05$ ).
